# Supplementary material for: Measuring quality of life of primary antibody deficiency patients using a disease-specific health-related quality of life questionnaire for common variable immunodeficiency (CVID_QoL)
Source: J Patient Rep Outcomes. 2019 Feb 26;3:15. doi: 10.1186/s41687-019-0101-x (PMC6391500; doi:10.1186/s41687-019-0101-x)
Supplement: Supplementary file 1 — Table S1. The Norwegian version of the CVID_QoL questionnaire. (DOCX 19 kb) [file 41687_2019_101_MOESM1_ESM.docx]

**Mer diagnosespesifikke spørsmål om din helse og livskvalitet[[1]](#footnote-1)**

I løpet av de siste tre månedene har sykdommen gjort at:

|  | **Aldri** | **Sjelden** | **Iblant** | **Ofte** | **Alltid** |
| --- | --- | --- | --- | --- | --- |
| 1 Jeg har følt meg trist |  |  |  |  |  |
| 2 Jeg har måttet endre mitt kosthold |  |  |  |  |  |
| 3 Jeg har følt sinne |  |  |  |  |  |
| 4 Jeg har hatt diaré |  |  |  |  |  |
| 5 Jeg har måttet gi opp å lage langsiktige planer |  |  |  |  |  |
| 6 Jeg har hatt hoste og/eller sliming |  |  |  |  |  |
| 7 Jeg har ikke kunnet ta meg av dem jeg er glad i slik jeg skulle ønske jeg kunne |  |  |  |  |  |
| 8 Jeg har vært redd for at min helse skulle forverres |  |  |  |  |  |
| 9 Jeg har hatt ubehag og/eller smerte i leddene mine |  |  |  |  |  |
| 10 Jeg har trengt hjelp til å ta vare på meg selv |  |  |  |  |  |
| 11 Jeg har vært redd jeg ville gå tom for medikamenter og/eller immunglobulinbehandling |  |  |  |  |  |
| 12 Jeg har vært redd for bivirkninger av immunglobulinterapien |  |  |  |  |  |
| 13 Jeg har vært bekymret for min framtid |  |  |  |  |  |
| 14 Jeg har unngått å forlate hjemmet mitt på grunn av diaré |  |  |  |  |  |
| 15 Jeg har følt meg mindre uavhengig enn vanlig |  |  |  |  |  |
| 16 Jeg har vært redd for å smitte andre med mine infeksjoner |  |  |  |  |  |
| 17 Det har vært tungt for meg å gjøre mitt vanlige arbeid/studier |  |  |  |  |  |
| 18 Jeg har vært redd for å dø |  |  |  |  |  |
| 19 Jeg har unngått å forlate huset på grunn av min hoste |  |  |  |  |  |
| 20 Jeg har hatt en tendens til å isolere meg |  |  |  |  |  |
| 21 Jeg har vært redd for å bli syk |  |  |  |  |  |
| 22 Jeg har følt meg svak |  |  |  |  |  |
| 23 Min seksuelle aktivitet har vært påvirket |  |  |  |  |  |
| 24 Immunglobulinterapien har vært plagsom |  |  |  |  |  |
| 25 Det har vært vanskelig å utføre mine vanlige fritidsaktiviteter |  |  |  |  |  |
| 26 Jeg har følt meg ubekvem på grunn av mine hudproblemer (prikker, rødhet, utslett, infeksjoner) |  |  |  |  |  |
| 27 Det har vært vanskelig å forholde seg til folk jeg tilbringer tid med |  |  |  |  |  |
| 28 Jeg har følt meg som en syk person |  |  |  |  |  |
| 29 Jeg har vært flau |  |  |  |  |  |
| 30 Jeg har vært redd jeg kunne bli smittet av andres sykdommer |  |  |  |  |  |
| 31 Jeg har hatt problemer med å forholde meg til andre pasienter med samme sykdom |  |  |  |  |  |
| 32 Jeg har følt meg trøtt |  |  |  |  |  |

1. Skjemaet er SSDs norske oversettelse av engelsk versjon av spørreskjema presentert i artikkelen *Development and Initial Validation of a Questionnaire to Measure Health-Related Quality of Life of Adults with Common Variable Immune Deficiency: The CVID_QoL Questionnaire (*Quinti et al. 2016). Artikkelen er tilgjengelig på <http://www.sciencedirect.com/science/article/pii/S2213219816303142>. Lisens for gjenbruk av skjemaet: <https://creativecommons.org/licenses/by-nc-nd/4.0/>. E-post-dialog med (andre)forfatter 25.01/01.03. [↑](#footnote-ref-1)
